# Supplementary material for: Association between exposure to traffic-related air pollution and pediatric allergic diseases based on modeled air pollution concentrations and traffic measures in Seoul, Korea: a comparative analysis
Source: Environ Health. 2020 Jan 14;19:6. doi: 10.1186/s12940-020-0563-6 (PMC6961284; doi:10.1186/s12940-020-0563-6)
Supplement: Supplementary file 3 — Additional file 3: Table S2. Odds ratios and 95% confidence intervals of symptoms and doctor-diagnoses of three allergic diseases for interquartile increases in individual-level annual average concentrations of NO2, PM10, and PM2.5 (6.46 ppm, 3.80 μg/m3, and 3.63 μg/m3, respectively) in 14,614 children of the Seoul Atopy Friendly School Project Survey in Seoul, Korea, for 2010. [file 12940_2020_563_MOESM3_ESM.docx]

Table S2. Odds ratios and 95% confidence intervals of symptoms and doctor-diagnoses of three allergic diseases for interquartile increases in individual-level annual average concentrations of NO2, PM10, and PM2.5 (6.46 ppm, 3.80 ug/m3, and 3.63 ug/m3, respectively) in 14,614 children of the Seoul Atopy Friendly School Project Survey in Seoul, Korea, for 2010

| Response variable | Model | Explanatory variable | | |
| --- | --- | --- | --- | --- |
| NO2 | PM10 | PM2.5 |
| Asthma symptom  (N=12,518) | Model 1 | 1.00 (0.92 – 1.08) | 1.03 (0.95 – 1.12) | 1.01 (0.93 – 1.09) |
| Model 2 | 1.00 (0.92 – 1.07) | 1.03 (0.95 – 1.12) | 1.01 (0.93 – 1.10) |
| Model 3 | 0.99 (0.91 – 1.07) | 1.01 (0.92 – 1.11) | 0.98 (0.90 – 1.08) |
| Asthma  Diagnosis  (N=12,518) | Model 1 | 0.99 (0.88 – 1.10) | 1.00 (0.88 – 1.13) | 0.99 (0.88 – 1.11) |
| Model 2 | 0.98 (0.88 – 1.10) | 1.00 (0.88 – 1.12) | 0.99 (0.88 – 1.12) |
| Model 3 | 0.98 (0.88 – 1.10) | 1.00 (0.88 – 1.13) | 0.99 (0.88 – 1.12) |
| Rhinitis  Symptom  (N=12,518) | Model 1 | 0.98 (0.94 – 1.02) | 1.00 (0.96 – 1.05) | 1.04 (1.00 – 1.09) |
| Model 2 | 0.98 (0.94 – 1.02) | 1.00 (0.96 – 1.05) | 1.04 (0.99 – 1.08) |
| Model 3 | 0.97 (0.93 – 1.02) | 1.00 (0.95 – 1.05) | 1.04 (0.99 – 1.09) |
| Rhinitis  Diagnosis  (N=12,518) | Model 1 | 0.97 (0.92 – 1.02) | 1.01 (0.96 – 1.06) | 1.04 (0.99 – 1.09) |
| Model 2 | 0.97 (0.92 – 1.02) | 1.00 (0.95 – 1.06) | 1.04 (0.99 – 1.09) |
| Model 3 | 0.97 (0.92 – 1.02) | 0.98 (0.92 – 1.04) | 1.04 (0.98 – 1.10) |
| Eczema  Symptom  (N=14,614) | Model 1 | 1.08 (1.03 – 1.13) | 1.06 (1.01 – 1.12) | 1.01 (0.96 – 1.07) |
| Model 2 | 1.07 (1.02 – 1.13) | 1.06 (1.01 – 1.12) | 1.01 (0.96 – 1.07) |
| Model 3 | 1.07 (1.02 – 1.13) | 1.06 (1.01 – 1.12) | 1.01 (0.95 – 1.07) |
| Eczema  Diagnosis  (N=14,614) | Model 1 | 1.08 (1.03 – 1.15) | 1.07 (1.01 – 1.13) | 1.03 (0.98 – 1.09) |
| Model 2 | 1.08 (1.03 – 1.14) | 1.07 (1.01 – 1.13) | 1.03 (0.98 – 1.10) |
| Model 3 | 1.08 (1.03 – 1.14) | 1.07 (1.01 – 1.13) | 1.04 (0.98 – 1.10) |
